# Supplementary material
Source: HighWire-hosted journal article supplement (https://dmd.aspetjournals.org/highwire/filestream/68551/field_highwire_adjunct_files/0/Supplemental_72124.pdf)
Supplement: Supplemental_72124.pdf [file Supplemental_72124.pdf]

**Evaluation of a Novel Renewable Hepatic Cell Model for Prediction of Clinical CYP3A4  
Induction Using a Correlation-based RIS Approach**

Rongjun Zuo, Feng Li, Sweta Parikh, Li Cao, Kirsten L. Cooper, Yulong Hong, Jin Liu, Ronald  
A. Faris, Daochuan Li, Hongbing Wang

Corning Life Sciences, Bedford, MA USA (R.Z., F.L., S.P., L.C., K.L.C.); Corning Incorporated,  
Science and Technology, Corning, NY USA (Y.H., J.L., R.A.F.); University of Maryland,  
School of Pharmacy, Baltimore, MD USA (D.L., H.W.)

Journal Title: Drug Metabolism & Disposition

Table S1 Table S1 Induction response in HepatoCells measured as CYP3A4 mRNA fold increase

| Rifampicin          |            |           |           | Phenytoin           |           |              |           | Phenobarbital       |           |              |           | Terbinafine         |           |           |           |
|---------------------|------------|-----------|-----------|---------------------|-----------|--------------|-----------|---------------------|-----------|--------------|-----------|---------------------|-----------|-----------|-----------|
| Conc.<br>( $\mu$ M) | Lot<br>2B  | Lot<br>3A | Lot<br>3B | Conc.<br>( $\mu$ M) | Lot<br>2B | Lot<br>3A    | Lot<br>3B | Conc.<br>( $\mu$ M) | Lot<br>2B | Lot<br>3A    | Lot<br>3B | Conc.<br>( $\mu$ M) | Lot<br>2B | Lot<br>3A | Lot<br>3B |
| 0.023               | <u>4.1</u> | 0.04      | 1.4       | 0.06                | 0.13      | 0.04         | -0.38     | 0.91                | 4.9       | 2.3          | 0.09      | 0.046               | -0.12     | -0.53     | -0.15     |
| 0.069               | 2.2        | 0.33      | 1.7       | 0.17                | -0.41     | <u>-0.63</u> | -0.60     | 2.7                 | 1.3       | -0.54        | 0.17      | 0.14                | -0.04     | -0.53     | 0.10      |
| 0.21                | 6.5        | 8.4       | 6.0       | 0.51                | 0.50      | -0.11        | -0.20     | 8.2                 | 1.2       | <u>-0.07</u> | 0.00      | 0.41                | 0.47      | 0.72      | 0.03      |
| 0.62                | 17         | 25        | 15        | 1.5                 | 0.52      | 0.54         | 0.65      | 25                  | 1.5       | 0.26         | -0.34     | 1.2                 | 3.1       | 1.9       | 6.9       |
| 1.9                 | 24         | 32        | 23        | 4.6                 | 2.7       | 0.62         | 3.4       | 74                  | 6.2       | 4.8          | 1.00      | 3.7                 | 9.8       | 22        | 13        |
| 5.6                 | 20         | 23        | 22        | 14                  | 11        | 15           | 5.4       | 222                 | 19        | 14           | 8.7       | 11                  | 18        | 24        | 21        |
| 17                  | 21         | <u>31</u> | 28        | 42                  | 20        | 37           | 32        | 667                 | 64        | 62           | 31        | 33                  | 19        | <b>14</b> | <b>14</b> |
|                     |            |           |           | 125                 | 23        | <u>39</u>    | 35        | 2000                | 110       | 135          | 73        | 100                 | <b>14</b> | <b>11</b> | <b>4</b>  |

| Sulfinpyrazone      |            |             |           | Probenecid          |           |           |           | Pioglitazone        |           |             |           | Dexamethasone       |           |             |              |
|---------------------|------------|-------------|-----------|---------------------|-----------|-----------|-----------|---------------------|-----------|-------------|-----------|---------------------|-----------|-------------|--------------|
| Conc.<br>( $\mu$ M) | Lot<br>2B  | Lot<br>3A   | Lot<br>3B | Conc.<br>( $\mu$ M) | Lot<br>2B | Lot<br>3A | Lot<br>3B | Conc.<br>( $\mu$ M) | Lot<br>2B | Lot<br>3A   | Lot<br>3B | Conc.<br>( $\mu$ M) | Lot<br>2B | Lot<br>3A   | Lot<br>3B    |
| 0.091               | <u>2.6</u> | <u>5.3</u>  | 6.4       | 0.14                | 0.08      | -0.19     | 0.40      | 0.0057              | 0.50      | 0.55        | -0.07     | 0.11                | -0.15     | -0.30       | <u>-0.31</u> |
| 0.27                | -0.16      | <u>0.26</u> | 1.1       | 0.41                | -0.15     | 0.42      | 0.74      | 0.017               | -0.06     | 0.20        | -0.17     | 0.34                | -0.25     | -0.59       | -0.55        |
| 0.82                | 0.14       | 2.7         | 1.2       | 1.2                 | -0.16     | -0.40     | -0.04     | 0.051               | 0.66      | <u>0.91</u> | 0.60      | 1.0                 | 0.01      | 0.63        | -0.02        |
| 2.47                | 0.99       | 2.7         | 1.5       | 3.7                 | 0.02      | -0.13     | -0.35     | 0.15                | 3.9       | 3.4         | 3.2       | 3.1                 | 0.31      | 0.22        | 0.40         |
| 7.41                | 5.1        | 4.2         | 8.0       | 11                  | 0.34      | -0.24     | 0.52      | 0.46                | 3.5       | <u>5.4</u>  | 2.9       | 9.3                 | 1.1       | <u>0.86</u> | 1.9          |
| 22                  | 15         | 27          | <u>19</u> | 33                  | 1.9       | 1.9       | 1.5       | 1.4                 | 6.9       | 6.4         | 5.1       | 28                  | 2.2       | 2.9         | 2.6          |
| 67                  | 31         | 38          | 28        | 100                 | 4.6       | 6.2       | 3.8       | 4.2                 | 20        | 27          | 12        | 83                  | <u>16</u> | 17          | 8.4          |
| 200                 | 28         | 53          | 38        | 300                 | 25        | 26        | 22        | 13                  | 33        | 31          | 15        | 250                 | 32        | 53          | 29           |

Underscored data not used for curve fitting due to replicate data points not able to reach <40% CV.

Bold data are not used for curve fitting since at such concentrations toxicity or enzyme inhibition appeared to be obvious.

Table S1 Table S1 Induction response in HepatoCells measured as CYP3A4 mRNA fold increase (Cont'd)

| Omeprazole          |           |           |              | Clotrimazole        |             |             |             | Nifedipine          |           |           |           | Flumazenil          |           |           |           |
|---------------------|-----------|-----------|--------------|---------------------|-------------|-------------|-------------|---------------------|-----------|-----------|-----------|---------------------|-----------|-----------|-----------|
| Conc.<br>( $\mu$ M) | Lot<br>2B | Lot<br>3A | Lot<br>3B    | Conc.<br>( $\mu$ M) | Lot<br>2B   | Lot<br>3A   | Lot<br>3B   | Conc.<br>( $\mu$ M) | Lot<br>2B | Lot<br>3A | Lot<br>3B | Conc.<br>( $\mu$ M) | Lot<br>2B | Lot<br>3A | Lot<br>3B |
| 0.05                | 1.8       | -0.05     | <u>-0.07</u> | 0.005               | -0.06       | 0.13        | 0.44        | 0.046               | 0.06      | 0.47      | 0.35      | 0.02                | -0.26     | -0.70     | 0.02      |
| 0.14                | 0.04      | -0.28     | -0.14        | 0.014               | 0.01        | -0.32       | 0.41        | 0.14                | 0.44      | 1.41      | 0.72      | 0.07                | -0.20     | -0.52     | -0.16     |
| 0.41                | 0.06      | -0.52     | -0.17        | 0.041               | 0.38        | 0.24        | 0.94        | 0.41                | 1.4       | 4.6       | 1.6       | 0.21                | -0.18     | -0.33     | -0.43     |
| 1.2                 | 0.46      | 1.3       | 0.49         | 0.12                | 2.0         | 4.0         | 3.0         | 1.2                 | 4.8       | 9.9       | 6.2       | 0.62                | -0.23     | -0.71     | 0.13      |
| 3.7                 | 2.5       | 1.7       | 2.9          | 0.37                | 5.7         | 8.4         | 9.5         | 3.7                 | 9.1       | 17.5      | 15        | 1.9                 | -0.05     | -0.65     | -0.15     |
| 11                  | 10        | 12        | 12           | 1.1                 | 12          | 16          | 17          | 11                  | 22        | 22        | 19        | 5.6                 | -0.02     | -0.57     | -0.34     |
| 33                  | 24        | 29        | 24           | 3.3                 | 16          | 18          | 17          | 33                  | 28        | 40        | 27        | 17                  | -0.13     | -0.40     | -0.14     |
| 100                 | 19        | 45        | 27           | 10                  | <b>0.78</b> | <b>0.09</b> | <b>0.32</b> | 100                 | <b>16</b> | <b>27</b> | 26        | 50                  | 0.08      | 0.04      | 0.12      |

| Quinidine           |           |           |           | Methotrexate        |           |           |           | Digoxin             |           |           |           | Carbamazepine       |           |           |           |
|---------------------|-----------|-----------|-----------|---------------------|-----------|-----------|-----------|---------------------|-----------|-----------|-----------|---------------------|-----------|-----------|-----------|
| Conc.<br>( $\mu$ M) | Lot<br>2B | Lot<br>3A | Lot<br>3B | Conc.<br>( $\mu$ M) | Lot<br>2B | Lot<br>3A | Lot<br>3B | Conc.<br>( $\mu$ M) | Lot<br>2B | Lot<br>3A | Lot<br>3B | Conc.<br>( $\mu$ M) | Lot<br>2B | Lot<br>3A | Lot<br>3B |
| 0.11                | 0.55      | 0.14      | 1.12      | 0.009               | -0.31     | 0.15      | -0.55     | 9.1E-05             | -0.35     | 0.01      | -0.25     | 0.23                | 0.62      | -0.16     | 2.26      |
| 0.34                | -0.36     | 0.78      | 1.12      | 0.03                | -0.49     | -0.63     | -0.43     | 0.0003              | -0.61     | -0.64     | -0.53     | 0.69                | -0.15     | -0.61     | 0.16      |
| 1.0                 | -0.42     | 0.90      | 0.34      | 0.082               | -0.47     | -0.29     | -0.41     | 0.0008              | 0.00      | 0.39      | -0.45     | 2.1                 | -0.08     | -0.24     | 0.19      |
| 3.1                 | 0.24      | 0.71      | 0.96      | 0.25                | -0.43     | -0.30     | -0.63     | 0.0025              | -0.33     | -0.52     | 0.06      | 6.2                 | 0.12      | 0.00      | 1.33      |
| 9.3                 | 0.44      | 0.18      | 0.58      | 0.74                | -0.50     | -0.74     | -0.27     | 0.0074              | -0.03     | -0.47     | -0.05     | 19                  | 2.07      | 0.62      | 2.60      |
| 28                  | 1.04      | 2.04      | 0.08      | 2.2                 | -0.56     | -0.35     | -0.39     | 0.0222              | -0.22     | -0.53     | -0.40     | 56                  | 4.7       | 4.5       | 7.5       |
| 83                  | 0.71      | 0.57      | 0.90      | 6.7                 | -0.62     | -0.79     | -0.68     | 0.0667              | -0.57     | -0.24     | -0.55     | 166.7               | 10.6      | 8.0       | 14.2      |
| 250                 | -0.55     | 0.00      | -0.44     | 20                  | -0.61     | -0.40     | -0.59     | 0.20                | -0.91     | -0.87     | -0.89     | 500                 | 16.2      | 9.9       | 13.0      |

Underscored data not used for curve fitting due to replicate data points not able to reach <40% CV.

Bold data are not used for curve fitting since at such concentrations toxicity or enzyme inhibition appeared to be obvious.

Table S1 Table S1 Induction response in HepatoCells measured as CYP3A4 mRNA fold increase (Cont'd)

| Rosiglitazone       |            |            |            | Primaquine          |           |           |           |
|---------------------|------------|------------|------------|---------------------|-----------|-----------|-----------|
| Conc.<br>( $\mu$ M) | Lot<br>2B  | Lot<br>3A  | Lot<br>3B  | Conc.<br>( $\mu$ M) | Lot<br>2B | Lot<br>3A | Lot<br>3B |
| 0.046               | 0.82       | 0.29       | -0.1       | 0.055               | 1.32      | -0.23     | 0.72      |
| 0.137               | 0.97       | 1.24       | 1.1        | 0.49                | 0.11      | -0.05     | 0.24      |
| 0.412               | 1.47       | 2.81       | 3.9        | 4.4                 | 0.02      | -0.35     | -0.15     |
| 1.2                 | 9.47       | 9.81       | 15         | 40                  | -0.51     | -0.15     | 0.13      |
| 3.7                 | 22         | 36         | 38         |                     |           |           |           |
| 11                  | 47         | 75         | 82         |                     |           |           |           |
| 33                  | 46         | 83         | 91         |                     |           |           |           |
| 100                 | <b>5.8</b> | <b>7.8</b> | <b>7.3</b> |                     |           |           |           |

Bold data are not used for curve fitting since at such concentrations toxicity or enzyme inhibition appeared to be obvious.

Table S2 Induction response in HepatoCells measured as CYP3A4 enzyme activity fold increase

| Rifampicin          |           |           | Phenytoin |                     |           | Phenobarbital |           |                     | Terbinafine |           |           |                     |           |           |           |
|---------------------|-----------|-----------|-----------|---------------------|-----------|---------------|-----------|---------------------|-------------|-----------|-----------|---------------------|-----------|-----------|-----------|
| Conc.<br>( $\mu$ M) | Lot<br>2B | Lot<br>3A | Lot<br>3B | Conc.<br>( $\mu$ M) | Lot<br>2B | Lot<br>3A     | Lot<br>3B | Conc.<br>( $\mu$ M) | Lot<br>2B   | Lot<br>3A | Lot<br>3B | Conc.<br>( $\mu$ M) | Lot<br>2B | Lot<br>3A | Lot<br>3B |
| 0.02                | 1.3       | 0.03      | 1.3       | 0.06                | 0.19      | 0.19          | 0.71      | 0.91                | 0.4         | 0.4       | 0.44      | 0.05                | 0.21      | 0.17      | 0.47      |
| 0.07                | 3.5       | 1.7       | 2.2       | 0.17                | 0.11      | 0.37          | 0.87      | 2.7                 | 0.4         | 0.0       | 0.60      | 0.14                | 0.39      | 0.58      | 0.51      |
| 0.21                | 7.8       | 5.1       | 4.5       | 0.51                | 0.33      | 0.43          | 0.73      | 8.2                 | 0.7         | 0.61      | 0.77      | 0.41                | 0.81      | 1.14      | 0.89      |
| 0.62                | 16        | 14        | 11        | 1.5                 | 0.48      | 0.67          | 0.80      | 25                  | 0.9         | 1.0       | 0.8       | 1.2                 | 2.9       | 3.3       | 4.4       |
| 1.9                 | 21        | 21        | 15        | 4.6                 | 0.6       | 0.91          | 1.3       | 74                  | 2.4         | 2.7       | 3         | 3.7                 | 11.3      | 17        | 12        |
| 5.6                 | 30        | 29        | 28        | 14                  | 2         | 2             | 2.8       | 222                 | 11          | 14        | 14.0      | 11                  | 15        | 19        | 15        |
| 16.7                | 27        | 31        | 24        | 42                  | 6         | 7             | 8         | 667                 | 31          | 47        | 42        | 33                  | <b>10</b> | <b>12</b> | <b>10</b> |
|                     |           |           |           | 125                 | 16        | 19            | 19        | 2000                | 33          | 52        | 43        | 100                 | <b>5</b>  | <b>7</b>  | <b>3</b>  |

| Sulfinpyrazone      |           |           | Probenecid |                     |           | Pioglitazone |           |                     | Dexamethasone |           |           |                     |           |           |           |
|---------------------|-----------|-----------|------------|---------------------|-----------|--------------|-----------|---------------------|---------------|-----------|-----------|---------------------|-----------|-----------|-----------|
| Conc.<br>( $\mu$ M) | Lot<br>2B | Lot<br>3A | Lot<br>3B  | Conc.<br>( $\mu$ M) | Lot<br>2B | Lot<br>3A    | Lot<br>3B | Conc.<br>( $\mu$ M) | Lot<br>2B     | Lot<br>3A | Lot<br>3B | Conc.<br>( $\mu$ M) | Lot<br>2B | Lot<br>3A | Lot<br>3B |
| 0.091               | 0.27      | 0.03      | 0.0        | 0.14                | 0.19      | -0.1         | -0.1      | 0.006               | 0.32          | 0.69      | 0.96      | 0.11                | -0.27     | -0.31     | -0.27     |
| 0.27                | 0.34      | -0.2      | 0.3        | 0.41                | -0.03     | 0.1          | 0.0       | 0.017               | 0.52          | 0.75      | 1.24      | 0.34                | -0.24     | -0.24     | -0.21     |
| 0.82                | 0.53      | 0.44      | 0.23       | 1.2                 | 0.19      | 0.0          | 0.0       | 0.051               | 0.52          | 0.89      | 1.35      | 1.03                | -0.07     | -0.16     | -0.11     |
| 2.5                 | 1.8       | 1.3       | 1.2        | 3.7                 | 0.39      | 0.0          | 0.0       | 0.154               | 0.95          | 1.52      | 1.71      | 3.09                | 0.01      | -0.16     | -0.33     |
| 7.4                 | 5.4       | 3.9       | 5.6        | 11                  | 0.41      | 0.0          | 0.2       | 0.46                | 1.41          | 2.55      | 3.91      | 9.26                | 0.44      | 0.16      | 0.34      |
| 22                  | 17        | 16        | 12         | 33                  | 1.3       | 0.7          | 0.72      | 1.4                 | 3.1           | 5.3       | 6.5       | 27.8                | 1.3       | 0.7       | 0.8       |
| 67                  | 25        | 22        | 20         | 100                 | 3.3       | 2.3          | 1.81      | 4.2                 | 8.8           | 15.7      | 20.6      | 83.3                | 4.0       | 3.2       | 3.4       |
| 200                 | <b>18</b> | 21        | 18         | 300                 | 12        | 8.0          | 5.88      | 12.5                | 18.8          | 37.9      | 34.8      | 250.0               | 6.9       | 6.2       | 7.0       |

Bold data are not used for curve fitting since at such concentrations toxicity or enzyme inhibition appeared to be obvious.

Table S2 Induction response in HepatoCells measured as CYP3A4 enzyme activity fold increase (Cont'd)

| Omeprazole |             |        | Clotrimazole |            |        | Nifedipine |        |            | Flumazenil   |              |             |            |        |        |        |
|------------|-------------|--------|--------------|------------|--------|------------|--------|------------|--------------|--------------|-------------|------------|--------|--------|--------|
| Conc. (μM) | Lot 2B      | Lot 3A | Lot 3B       | Conc. (μM) | Lot 2B | Lot 3A     | Lot 3B | Conc. (μM) | Lot 2B       | Lot 3A       | Lot 3B      | Conc. (μM) | Lot 2B | Lot 3A | Lot 3B |
| 0.05       | -0.05       | -0.09  | -0.11        | 0.005      | -0.43  | -0.29      | -0.28  | 0.046      | -0.56        | -0.55        | -0.60       | 0.023      | -0.01  | -0.35  | -0.16  |
| 0.14       | 0.02        | -0.13  | -0.15        | 0.014      | -0.35  | -0.30      | -0.28  | 0.14       | 0.03         | -0.07        | -0.30       | 0.069      | 0.02   | -0.12  | -0.21  |
| 0.41       | 0.07        | -0.09  | 0.00         | 0.041      | -0.34  | -0.26      | -0.31  | 0.41       | 0.88         | 0.91         | 0.13        | 0.21       | -0.09  | -0.15  | -0.17  |
| 1.23       | 0.16        | 0.19   | 0.10         | 0.12       | -0.38  | -0.34      | -0.43  | 1.2        | 2.43         | 2.24         | 1.21        | 0.62       | 0.07   | -0.17  | 0.04   |
| 3.70       | 0.75        | 0.27   | 0.21         | 0.37       | -0.64  | -0.45      | -0.54  | 3.7        | 3.84         | 3.26         | 1.98        | 1.9        | -0.05  | -0.25  | -0.12  |
| 11.1       | 1.25        | 0.94   | 1.41         | 1.11       | -0.74  | -0.54      | -0.60  | 11         | <b>2.99</b>  | <b>0.96</b>  | <b>0.43</b> | 5.6        | 0.16   | -0.18  | -0.12  |
| 33.3       | 1.25        | 0.92   | <b>0.65</b>  | 3.33       | -0.77  | -0.57      | -0.65  | 33         | <b>0.69</b>  | <b>0.59</b>  | <b>0.08</b> | 17         | 0.21   | -0.01  | -0.08  |
| 100.0      | <b>0.61</b> | 1.09   | <b>0.49</b>  | 10.0       | -0.76  | -0.57      | -0.64  | 100        | <b>-0.35</b> | <b>-0.31</b> | <b>0.80</b> | 50         | 0.29   | 0.18   | 0.30   |

| Quinidine  |        |        | Methotrexate |            |        | Digoxin |        |            | Carbamazepine |        |        |            |             |             |             |
|------------|--------|--------|--------------|------------|--------|---------|--------|------------|---------------|--------|--------|------------|-------------|-------------|-------------|
| Conc. (μM) | Lot 2B | Lot 3A | Lot 3B       | Conc. (μM) | Lot 2B | Lot 3A  | Lot 3B | Conc. (μM) | Lot 2B        | Lot 3A | Lot 3B | Conc. (μM) | Lot 2B      | Lot 3A      | Lot 3B      |
| 0.11       | -0.25  | 0.00   | -0.03        | 0.01       | -0.19  | 0.00    | -0.28  | 9.1E-05    | -0.10         | -0.02  | -0.10  | 0.23       | -0.08       | 0.16        | 0.22        |
| 0.34       | -0.30  | -0.15  | -0.04        | 0.03       | -0.15  | -0.08   | -0.30  | 0.0003     | -0.11         | -0.01  | -0.30  | 0.69       | -0.02       | 0.01        | 0.20        |
| 1.0        | -0.13  | -0.21  | -0.03        | 0.08       | -0.19  | -0.21   | -0.26  | 0.001      | 0.21          | 0.06   | -0.17  | 2.1        | 0.11        | 0.18        | 0.18        |
| 3.1        | 0.04   | 0.22   | 0.08         | 0.25       | -0.30  | -0.27   | -0.43  | 0.002      | 0.02          | -0.16  | -0.24  | 6.2        | 0.14        | 0.37        | 0.59        |
| 9.3        | 0.05   | -0.10  | 0.03         | 0.74       | -0.35  | -0.32   | -0.35  | 0.007      | 0.09          | -0.19  | -0.29  | 18.5       | 1.10        | 1.33        | 1.57        |
| 27.8       | 0.00   | 0.21   | -0.31        | 2.22       | -0.37  | -0.21   | -0.37  | 0.022      | 0.00          | -0.17  | -0.36  | 55.6       | 3.82        | 4.66        | 5.34        |
| 83.3       | -0.47  | -0.30  | -0.39        | 6.67       | -0.41  | -0.35   | -0.42  | 0.067      | -0.21         | -0.20  | -0.30  | 167        | 6.70        | 6.20        | 7.85        |
| 250        | -0.83  | -0.65  | -0.70        | 20.00      | -0.37  | -0.29   | -0.40  | 0.2        | -0.73         | -0.57  | -0.62  | 500        | <b>2.44</b> | <b>2.81</b> | <b>3.25</b> |

Bold data are not used for curve fitting since at such concentrations toxicity or enzyme inhibition appeared to be obvious.

Table S2 Induction response in HepatoCells measured as CYP3A4 enzyme activity fold increase (Cont'd)

| Rosiglitazone       |             |             |             | Primaquine          |           |           |           |
|---------------------|-------------|-------------|-------------|---------------------|-----------|-----------|-----------|
| Conc.<br>( $\mu$ M) | Lot<br>2B   | Lot<br>3A   | Lot<br>3B   | Conc.<br>( $\mu$ M) | Lot<br>2B | Lot<br>3A | Lot<br>3B |
| 0.05                | 0.42        | 0.62        | 0.44        | 0.05                | 0.20      | 0.11      | 0.05      |
| 0.14                | 0.53        | 0.96        | 0.90        | 0.49                | -0.18     | -0.05     | -0.06     |
| 0.41                | 1.06        | 1.49        | 1.61        | 4.44                | -0.02     | 0.13      | 0.06      |
| 1.23                | 3.9         | 4.27        | 4.64        | 40.00               | -0.17     | 0.00      | 0.36      |
| 3.70                | 11          | 16          | 14          |                     |           |           |           |
| 11                  | 25          | 36          | 33          |                     |           |           |           |
| 33                  | <b>15</b>   | <b>21</b>   | <b>23</b>   |                     |           |           |           |
| 100                 | <b>0.02</b> | <b>0.73</b> | <b>0.45</b> |                     |           |           |           |

Bold data are not used for curve fitting since at such concentrations toxicity or enzyme inhibition appeared to be obvious.

Table S3 Slope factors using Sigmoidal Hill 4 parameter function for curving fitting of concentration dependent induction response

| Compound       | Enzyme activity fold increase |        |        | mRNA expression fold increase |        |        |
|----------------|-------------------------------|--------|--------|-------------------------------|--------|--------|
|                | Lot 2B                        | Lot 3A | Lot 3B | Lot 2B                        | Lot 3A | Lot 3B |
| Rifampicin     | 1.0                           | 1.0    | 1.2    | 2.4                           | 3.1    | 1.3    |
| Phenytoin      | 1.4                           | 1.4    | 1.3    | 1.7                           | 3.6    | 3.6    |
| Carbamazepine  | 1.6                           | 2.1    | 1.9    | 1.1                           | 1.6    | 2.5    |
| Phenobarbital  | 3.1                           | 2.8    | 3.7    | 1.7                           | 1.6    | 1.4    |
| Terbinafine    | 2.4                           | 3.6    | 1.8    | 1.7                           | 4.2    | 1.0    |
| Sulfinpyrazone | 1.6                           | 2.5    | 1.6    | 1.2                           | 1.3    | 1.2    |
| Probenecid     | 1.2                           | 1.1    | 1.0    | 1.5                           | 1.3    | 1.6    |
| Pioglitazone   | 1.2                           | 1.1    | 1.5    | 1.3                           | 3.1    | 0.8    |
| Dexamethasone  | 1.2                           | 1.4    | 1.3    | 1.2                           | 1.8    | 1.1    |
| Rosiglitazone  | 1.2                           | 1.5    | 1.2    | 2.0                           | 2.0    | 1.7    |
| Omeprazole     | 2.2                           | 1.4    | 1.4    | 1.8                           | 1.3    | 1.9    |
| Nifedipine     | 0.9                           | 1.0    | 1.3    | 1.3                           | 0.4    | 1.1    |
| Clotrimazole   | na                            | na     | na     | 1.2                           | 1.4    | 2.0    |
| Quinidine      | na                            | na     | na     | na                            | na     | na     |
| Flumazenil     | na                            | na     | na     | na                            | na     | na     |
| Primaquine     | na                            | na     | na     | na                            | na     | na     |
| Methotrexate   | na                            | na     | na     | na                            | na     | na     |
| Digoxin        | na                            | na     | na     | na                            | na     | na     |

na: no slope factors reported since no concentration-dependent curve was obtained.
